# Supplementary material for: Enantioselective rhodium-catalyzed addition of arylboronic acids to trifluoromethyl ketones
Source: Royal Society of Chemistry journal article supplement (doi:10.1039/b609453h), 2006-01-01
Supplement: b609453h1.pdf [file b609453h1.pdf]

## SUPPORTING INFORMATION

### **Enantioselective Rhodium-Catalyzed Addition of Arylboronic Acids to Trifluoromethyl Ketones**

Sébastien L. X. Martina,<sup>a</sup> Richard B. C. Jagt,<sup>a</sup> Johannes G. de  
Vries,<sup>\*b</sup> Ben L. Feringa,<sup>\*a</sup> Adriaan J. Minnaard<sup>\*a</sup>

<sup>a</sup> *Department of Organic and Molecular Inorganic Chemistry,  
Stratingh Institute, University of Groningen, Nijenborgh 4, 9747  
AG, Groningen, The Netherlands*

<sup>b</sup> *DSM Pharmaceutical Products - Advanced Synthesis & Catalysis,  
P.O. box 18, 6160 MD Geleen, The Netherlands*

**General remarks:** All air- and moisture-sensitive manipulations were carried out under a dry nitrogen atmosphere using standard Schlenk techniques.  $^1\text{H}$  NMR and  $^{19}\text{F}$  NMR spectra were recorded on a Varian 400 (400 and 376 MHz, respectively).  $^{13}\text{C}$  NMR spectra were recorded on a Varian 300 (75 MHz). Chemical shifts ( $\delta$ ) are quoted in ppm using residual solvent as internal standard ( $\delta_{\text{C}}$  77.16 and  $\delta_{\text{H}}$  7.26 for  $\text{CDCl}_3$ ). For  $^{19}\text{F}$ -NMR an external reference was used ( $\alpha,\alpha,\alpha$ -trifluorotoluene: -63.8 ppm). Mass spectra (HRMS) were recorded on an AEI MS-902. Optical rotations were measured on a Schmidt and Haensch Polartronic MH8.  $\text{Rh}(\text{acac})(\text{C}_2\text{H}_4)_2$  was purchased from Strem and used without further purification. All other chemicals were purchased from Acros or Aldrich and used as received. Flash chromatography was performed using silica gel 60 Å (Merck, 230-400 mesh). Ligand (*S*)-**L** was prepared according to a literature procedure.<sup>1</sup>

### Enantioselective Catalytic Addition Reactions

**General Procedure for Table 1.** In a flame dried Schlenk tube under a nitrogen atmosphere,  $\text{Rh}(\text{acac})(\text{C}_2\text{H}_4)_2$  (2.30 mg, 9  $\mu\text{mol}$ , 5 mol%) and ligand (*S*)-**L** (10.16 mg, 22  $\mu\text{mol}$ , 12.5 mol%) were dissolved in MTBE (2.5 mL). After 10 min at 25 °C, 2,2,2-trifluoroacetophenone **1a** or **1b** (0.178 mmol) was added, followed by the addition of 3 equiv arylboronic acid (0.534 mmol). After stirring for 20 h at reflux temperature, the mixture was quenched with a 12.5 % aqueous ammonia solution and extracted with EtOAc. The organic phase was dried over  $\text{MgSO}_4$ , filtered, and concentrated *in vacuo*. Products **3a-j** were purified by flash chromatography using eluent conditions reported for TLC (*vide infra*).

**Table 1, entry 1: 2,2,2-trifluoro-1-(4-methoxyphenyl)-1-phenyl-1-ethanol (3a).** Yield: 50% (colourless oil). TLC conditions: (hexane/ethylacetate = 90/10)  $R_f$  0.25.  $^{19}\text{F}$  NMR ( $\text{CDCl}_3$ )  $\delta$  = -75.87;  $^1\text{H}$  NMR ( $\text{CDCl}_3$ )  $\delta$  = 7.52-7.48 (m, 2H), 7.42-7.34 (m, 5H), 6.90-6.85 (m, 2H), 3.81 (s, 3H), 2.86 (s, 1H);  $^{13}\text{C}$  NMR ( $\text{CDCl}_3$ )  $\delta$  = 159.76, 139.67, 131.68, 128.95, 128.94, 128.70, 128.34, 127.53, 125.52 (q,  $J_{\text{CF}}$  = 284 Hz), 79.35 (q,  $J_{\text{CF}}$  = 28 Hz), 55.38. HRMS calculated for  $\text{C}_{15}\text{H}_{13}\text{O}_2\text{F}_3$ :  $m/z$  282.0867, found: 282.0889; The ee was determined by chiral HPLC on a DAICEL AD

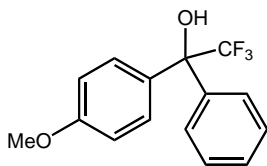

column with heptane/2-propanol = 90/10. Retention times: 6.3 and 7.2 min. 68% ee.  $[\alpha]_D = +2.2$  ( $c = 9.84$ ,  $\text{CHCl}_3$ ).

**Table 1, entry 2 and entry 5: 2,2,2-trifluoro-1-(4-chlorophenyl)-1-phenyl-1-ethanol (3b).** Yield for entry 2: 28% (colourless oil).

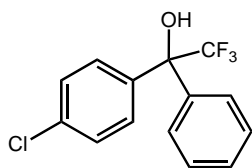

Yield for entry 5: 90% (colourless oil). TLC conditions: (hexane/ethyl acetate = 90/10)  $R_f$  0.32.  $^{19}\text{F}$  NMR ( $\text{CDCl}_3$ )  $\delta = -75.84$ ;  $^1\text{H}$  NMR ( $\text{CDCl}_3$ )  $\delta = 7.50$ - $7.31$  (m, 9H),  $2.87$  (s, 1H);  $^{13}\text{C}$  NMR ( $\text{CDCl}_3$ )  $\delta = 139.15$ ,  $137.82$ ,  $134.94$ ,  $129.09$ ,  $129.05$ ,  $128.59$ ,  $128.54$ ,  $127.39$ ,  $125.25$  (q,  $J_{\text{CF}} = 284$  Hz),  $79.31$  (q,  $J_{\text{CF}} = 29$  Hz). HRMS calculated for  $\text{C}_{14}\text{H}_{10}\text{OF}_3^{37}\text{Cl}$ :  $m/z$  288.0343, found: 288.0362; The ee was determined by chiral HPLC on a DAICEL AD column with heptane/2-propanol = 90/10. Retention times: 4.7 and 5.1 min. 68% ee for entry 1. 79% ee for entry 5.  $[\alpha]_D = +13.3$  ( $c = 6.93$ ,  $\text{CHCl}_3$ ).

**Table 1, entry 3: 2,2,2-trifluoro-1-(4-chlorophenyl)-1-(4-methoxyphenyl)-1-ethanol (3c).** Yield: 96% (yellow oil). TLC

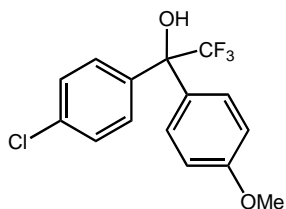

conditions: (hexane/ethylacetate = 95/5)  $R_f$  0.35.  $^{19}\text{F}$  NMR ( $\text{CDCl}_3$ )  $\delta = -76.03$ ;  $^1\text{H}$  NMR ( $\text{CDCl}_3$ )  $\delta = 7.44$ - $7.31$  (m, 6H),  $6.90$ - $6.85$  (m, 2H),  $3.81$  (s, 3H),  $2.85$  (s, 1H);  $^{13}\text{C}$  NMR ( $\text{CDCl}_3$ )  $\delta = 159.94$ ,  $138.04$ ,  $134.84$ ,  $131.31$ ,  $129.11$ ,  $128.85$ ,  $128.48$ ,  $125.32$  (q,  $J_{\text{CF}} = 285$  Hz),  $113.90$ ,  $79.06$  (q,  $J_{\text{CF}} = 29$  Hz),  $55.44$ . HRMS calculated for  $\text{C}_{15}\text{H}_{12}\text{OF}_3^{37}\text{Cl}$ :  $m/z$  318.0453, found: 318.0452. The ee was determined by chiral HPLC on a Chiralcel OB-H column with heptane/2-propanol = 90/10. Retention times: 10.0 and 11.0 min. 68% ee.  $[\alpha]_D = +13.7$  ( $c = 11.23$ ,  $\text{CHCl}_3$ ).

**Table 1, entry 4: 2,2,2-trifluoro-1-(4-chlorophenyl)-1-(4-methylphenyl)-1-ethanol (3d).** Yield: 91% (colourless oil). TLC

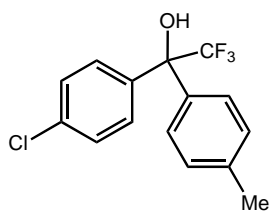

conditions: (hexane/ethylacetate = 95/5)  $R_f$  0.51.  $^{19}\text{F}$  NMR ( $\text{CDCl}_3$ )  $\delta = -75.95$ ;  $^1\text{H}$  NMR ( $\text{CDCl}_3$ )  $\delta = 7.43$  (d, 2H,  $J_{\text{CF}} = 8.4$  Hz),  $7.37$ - $7.31$  (m, 4H),  $7.18$  (d, 2H,  $J_{\text{CF}} = 8.4$  Hz),  $2.85$  (s, 1H),  $2.36$  (s, 3H);  $^{13}\text{C}$  NMR ( $\text{CDCl}_3$ )  $\delta = 139.03$ ,  $137.91$ ,  $136.30$ ,  $134.84$ ,  $129.29$ ,  $129.11$ ,  $128.48$ ,  $127.28$ ,  $125.27$  (q,  $J_{\text{CF}} = 284$  Hz),  $79.17$  (q,  $J_{\text{CF}} = 29$  Hz),  $21.21$ . HRMS calculated for  $\text{C}_{15}\text{H}_{12}\text{OF}_3^{35}\text{Cl}$ :  $m/z$  300.0529, found: 300.0516. The ee was determined by chiral HPLC on a DAICEL AD column with heptane/2-propanol =

90/10. 83% ee. Retention times: 15.0 and 17.5 min. 83% ee.  $[\alpha]_D = +15.9$  ( $c = 8.43$ ,  $\text{CHCl}_3$ ).

**Table 1, entry 6: 2,2,2-trifluoro-(4-chlorophenyl)-1-(3-methoxyphenyl)-1-ethanol (3e).** Yield: 94% (colourless oil). TLC

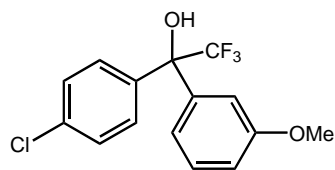

conditions: (hexane/ethylacetate = 95/5)  $R_f$  0.28.  $^{19}\text{F}$  NMR ( $\text{CDCl}_3$ )  $\delta = -75.83$ ;  $^1\text{H}$  NMR ( $\text{CDCl}_3$ )  $\delta = 7.40$  (d, 2H,  $J_{\text{CF}} = 8.4$  Hz), 7.32-7.22 (m, 3H), 7.10-6.99 (m, 2H), 6.87 (ddd, 1H,  $J_{\text{CF}} = 8.0, 2.4, 1.2$  Hz), 3.75 (s, 3 H), 2.88 (s, 1H);  $^{13}\text{C}$  NMR ( $\text{CDCl}_3$ )  $\delta = 159.63, 140.58, 137.62, 134.94, 129.63, 129.00, 128.54, 125.15$  (q,  $J_{\text{CF}} = 284$  Hz), 114.14, 113.61, 79.17 (q,  $J_{\text{CF}} = 29$  Hz), 55.44. HRMS calculated for  $\text{C}_{15}\text{H}_{12}\text{O}_2\text{F}_3^{37}\text{Cl}$ :  $m/z$  318.0448, found: 318.0460; The ee was determined by chiral HPLC on a DAICEL AD column with heptane/2-propanol = 85/15. Retention times: 4.8 and 5.4 min. 71% ee.  $[\alpha]_D = +8.5$  ( $c = 9.62$ ,  $\text{CHCl}_3$ ).

**Table 1, entry 7: 2,2,2-trifluoro-(4-chlorophenyl)-1-(3-methylphenyl)-1-ethanol (3f).** Yield: 91% (colourless oil). TLC

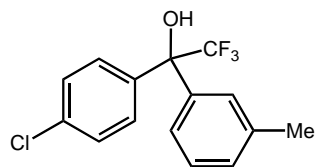

conditions: (hexane/ethylacetate = 95/5)  $R_f$  0.50.  $^{19}\text{F}$  NMR ( $\text{CDCl}_3$ )  $\delta = -75.79$ ;  $^1\text{H}$  NMR ( $\text{CDCl}_3$ )  $\delta = 7.43$  (d, 2H,  $J_{\text{CF}} = 8.4$  Hz), 7.36-7.24 (m, 5H), 7.21-7.17 (m, 1H), 2.87 (s, 1H), 2.36 (s, 3H);  $^{13}\text{C}$  NMR ( $\text{CDCl}_3$ )  $\delta = 139.13, 138.43, 137.85, 134.86, 129.81, 129.11, 128.51, 128.46, 127.96, 125.24$  (q,  $J_{\text{CF}} = 285$  Hz), 123.33, 79.25 (q,  $J_{\text{CF}} = 29$  Hz), 21.71. HRMS calculated for  $\text{C}_{15}\text{H}_{12}\text{OF}_3^{35}\text{Cl}$ :  $m/z$  300.0529, found: 300.0525. The ee was determined by chiral HPLC on a DAICEL AD column with heptane/2-propanol = 85/15. Retention times: 3.9 and 4.2 min. 76% ee.  $[\alpha]_D = +15.7$  ( $c = 16.81$ ,  $\text{CHCl}_3$ ).

**Table 1, entry 8: 2,2,2-trifluoro-(4-chlorophenyl)-1-(3-chlorophenyl)-1-ethanol (3g).** Yield: 52% (colourless oil). TLC

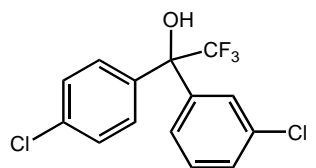

conditions: (hexane/ethylacetate = 90/10)  $R_f$  0.30.  $^{19}\text{F}$  NMR ( $\text{CDCl}_3$ )  $\delta = -75.90$ ;  $^1\text{H}$  ( $\text{CDCl}_3$ )  $\delta = 7.51-7.28$  (m, 8H), 2.91 (s, 1H);  $^{13}\text{C}$  NMR ( $\text{CDCl}_3$ )  $\delta = 140.89, 137.27, 135.32, 134.71, 129.81, 129.32, 128.96, 128.93, 128.82, 127.75, 125.70, 125.66, 124.97$  (q,  $J_{\text{CF}} = 284$  Hz), 123.33, 78.99 (q,  $J_{\text{CF}} = 29$  Hz). HRMS calculated for  $\text{C}_{14}\text{H}_9\text{OF}_3^{35}\text{Cl}_2$ :  $m/z$  319.9982, found: 319.9992.

The ee was determined by chiral HPLC on a DAICEL AD column with heptane/2-propanol = 90/10. Retention times: 4.4 and 4.7 min. 83% ee.  $[\alpha]_D = -7.2$  ( $c = 9.75$ ,  $\text{CHCl}_3$ ).

**Table 1, entry 9: 2,2,2-trifluoro-(4-chlorophenyl)-1-(2-methylphenyl)-1-ethanol (3h).** Yield: 40% (colourless oil). TLC

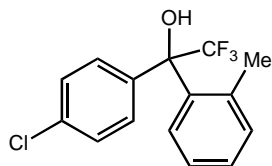

conditions: (hexane/ethylacetate = 90/10)  $R_f$  0.40.  $^{19}\text{F}$  NMR ( $\text{CDCl}_3$ )  $\delta = -75.62$ ;  $^1\text{H}$  ( $\text{CDCl}_3$ )  $\delta = 7.70$ – $7.66$  (m, 1H),  $7.36$ – $7.24$  (m, 6H),  $7.19$ – $7.15$  (m, 1H),  $2.80$  (s, 1H),  $1.96$  (s, 3H);  $^{13}\text{C}$  NMR ( $\text{CDCl}_3$ )  $\delta = 138.72$ ,  $136.65$ ,  $134.73$ ,  $133.64$ ,  $129.34$ ,  $129.24$ ,  $128.30$ ,  $127.07$  (q,  $J_{\text{CF}} = 3.8$  Hz),  $125.17$  (q,  $J_{\text{CF}} = 285$  Hz),  $123.75$ ,  $80.19$  (q,  $J_{\text{CF}} = 28$  Hz),  $21.46$ . HRMS calculated for  $\text{C}_{15}\text{H}_{12}\text{OF}_3^{37}\text{Cl}$ :  $m/z$  302.0499, found: 302.0501. The ee was determined by chiral HPLC on a DAICEL AD column with heptane/2-propanol = 90/10. Retention times: 3.7 and 4.1 min. 50% ee.  $[\alpha]_D = +45.5$  ( $c = 7.83$ ,  $\text{CHCl}_3$ ).

**Table 1, entry 10: 2,2,2-trifluoro-(4-chlorophenyl)-1-(2-naphthyl)-1-ethanol (3i).** Yield: 69% (colourless oil). TLC

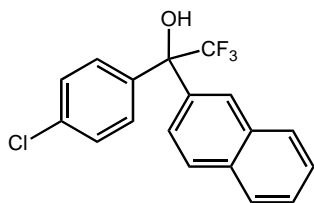

conditions: (hexane/ethylacetate, 90/10)  $R_f$  0.30.  $^{19}\text{F}$  NMR ( $\text{CDCl}_3$ )  $\delta = -75.53$ ;  $^1\text{H}$  NMR ( $\text{CDCl}_3$ )  $\delta = 8.08$  (s, 1H),  $8.00$ – $7.81$  (m, 3H),  $7.57$ – $7.42$  (m, 5H),  $7.35$  (d, 2H,  $J = 8.4$  Hz),  $3.00$  (s, 1H);  $^{13}\text{C}$  NMR ( $\text{CDCl}_3$ )  $\delta = 137.66$ ,  $136.20$ ,  $135.03$ ,  $133.20$ ,  $132.69$ ,  $129.21$ ,  $128.80$ ,  $128.61$ ,  $128.03$ ,  $127.69$ ,  $126.83$ ,  $126.57$ ,  $125.95$ ,  $124.98$ ,  $125.32$  (q,  $J_{\text{CF}} = 285$  Hz),  $79.50$  (q,  $J_{\text{CF}} = 28$  Hz). HRMS calculated for  $\text{C}_{18}\text{H}_{12}\text{OF}_3^{35}\text{Cl}$ :  $m/z$  336.0529, found: 336.0513. The ee was determined by chiral HPLC on a Chiralcel OD column, heptane/2-propanol = 85/15. Retention times: 5.3 and 6.9 min. 76% ee.  $[\alpha]_D = +40.6$  ( $c = 12.2$ ,  $\text{CHCl}_3$ ).

## References

(1) Bernsmann, H.; Van den Berg, M.; Hoen, R.; Minnaard, A. J.; Mehler, G.; Reetz, M. T.; De Vries, J. G.; Feringa, B.L. *J. Org. Chem.* **2005**, *70*, 943.
